1 The effect of susceptible and resistant potato cultivars on bacterial communities in the  
2 tuberosphere of potato in soil suppressive or conducive to common scab disease

3  
4  
5 Jan Kopecky<sup>1</sup>, Zuzana Samkova<sup>1</sup>, Ensyeh Sarikhani<sup>1</sup>, Martina Kyselková<sup>2</sup>, Marek Omelka<sup>3</sup>,  
6 Vaclav Kristufek<sup>2</sup>, Jiri Divis<sup>4</sup>, Geneviève G. Grundmann<sup>5</sup>, Yvan Moenne-Loccoz<sup>5</sup>, Marketa  
7 Sagova-Mareckova<sup>1,6#</sup>

8  
9 <sup>1</sup>Epidemiology and Ecology of Microorganisms, Crop Research Institute, Prague, Czech Republic.

10 <sup>2</sup>Institute of Soil Biology, Biology Centre of the Czech Academy of Sciences, v.v.i., České  
11 Budějovice, Czech Republic.

12 <sup>3</sup>Dept. of Probability and Mathematical Statistics, Faculty of Mathematics and Physics, Charles  
13 University, Prague, Czech Republic.

14 <sup>4</sup>Faculty of Agriculture, University of South Bohemia, České Budějovice, Czech Republic.

15 <sup>5</sup>UMR5557 Ecologie Microbienne, Univ Lyon, Université Claude Bernard Lyon 1, CNRS, INRA,  
16 VetAgro Sup, Villeurbanne, France

17 <sup>6</sup>Dept. of Microbiology, Nutrition and Dietetics, Faculty of Agrobiolgy, Food and Natural  
18 Resources, Czech University of Life Sciences, Prague, Czech Republic.

19

20 Running Head: Resistant potato cultivar and suppressive soil

21

22 #Address correspondence to Marketa Sagova-Mareckova, [marketa.sagova@gmail.com](mailto:marketa.sagova@gmail.com).

23

24 **ABSTRACT** Connections between the structure of bacterial communities in suppressive soils  
25 and potato resistance to common scab (CS) are not well understood. In this study, one resistant  
26 and one susceptible cultivar were grown in a conducive and suppressive field to assess cultivar  
27 resistance × soil suppressiveness interactions. The resistant cultivar had a higher Mg content in  
28 periderm compare to susceptible cultivar, while suppressive soil had lower pH (5.3 vs 5.9), N, C,  
29 P, Ca contents but higher Fe and S compared with the conducive soil. Bacteria and actinobacteria  
30 numbers were higher in the conducive soil. Copy numbers of *txtB* gene (coding for a  
31 pathogenicity determinant) were similar in both soils but were higher in the conducive soil (for  
32 periderm samples) and in the susceptible cultivar (for conducive soil samples). Taxonomic  
33 microarray analysis and Illumina sequencing of 16S rRNA genes amplicon showed that bacterial  
34 community differed between resistant vs susceptible cultivar and to a lesser extend between  
35 suppressive vs conducive soil. Bacteria participating in soil suppression belonged to  
36 *Pseudomonadaceae*, *Bradyrhizobiaceae*, *Acetobacteraceae* and *Paenibacillaceae*, while resistant  
37 cultivars selected a bacterial community resembling that of the suppressive soil, which was  
38 enriched in *Nitrospirae* and *Acidobacteria*. Thus, the analysis of soil suppressiveness×cultivar  
39 resistance interactions enabled to gain new insight to CS control in the field.

40

#### 41 **IMPORTANCE**

42 It was demonstrated that potato cultivars susceptible and resistant to common scab select  
43 differing bacterial community and above that this trait is further modified in suppressive and  
44 conducive soil. Common scab severity was diminished by either resistant cultivar or suppressive  
45 soil but without additive effect between them. Out of the two factors, potato cultivar had a more  
46 significant influence on tuberosphere bacterial community composition than soil. Results  
47 highlighted the usefulness of both cultivar resistance and soil suppressiveness traits in

48 understanding and managing disease control of crops.

49

50

51 **KEYWORDS** Soil bacterial community, potato rhizosphere, *Actinobacteria*, *Streptomyces*,

52 thaxtomin

53 Suppressives soils were described as soils in which disease severity remains low, in spite of the  
54 presence of a pathogen, a susceptible host, and climatic conditions favorable for disease  
55 development (1, 2). Relatively few soils with suppressive character have been described in the  
56 world to date (3). They represent a unique model for studying plant disease control. It is of prime  
57 interest to conserve their functioning, and ultimately, these soils may help us to learn how to  
58 establish suppressive character of soil at other sites (4).

59 It is agreed that soil suppressiveness is related to soil health and crop productivity through  
60 physico-chemical conditions or microbial communities (5, 6). Yet, suppressiveness is difficult to  
61 understand because in soil, (i) most physico-chemical factors are not independent from one  
62 another, (ii) phytopathogenic taxa may display genetic and functional diversity, and (iii)  
63 microbial communities are composed of many taxonomic groups with unknown functions and  
64 their structure is affected not only by soil but also by the plant host (4). Therefore, the assessment  
65 of suppressive soils may necessitate to target potential interactions between all these ecological  
66 factors.

67 Common scab (CS) of potatoes is a soil-borne disease caused by *Streptomyces* spp. that  
68 produce thaxtomin phytotoxins, and for which suppressive soils were reported in the USA (6, 7).  
69 In these systems, disease control is largely attributed to biological interactions (mostly  
70 competition and antagonism) between plant-beneficial microbiota and pathogens mediated via  
71 antibiotic production or enzymatic activities (4, 8). In one situation, nonpathogenic *Streptomyces*  
72 spp. were correlated with CS suppressiveness (6), and it was also hypothesized that other  
73 actinobacteria may be involved in this disease suppression (4).

74 In our previous investigations, two sites (Vyklantice and Zdirec) from the Czech  
75 Republic, where CS suppressive and conducive fields occur next to each other were studied both  
76 in field trials (9, 10) and pot experiments (11). The CS suppressive character of the fields differed

77 according to field location, presumably in relationship to local soil chemical properties (9). Potato  
78 cultivars susceptible and resistant to CS have different ecophysiologicals, and they differ in  
79 chemical composition of the potato periderm, which may further influence microbial community  
80 structure (12). Therefore, our hypothesis was that pathogen control via plant-enriched taxa  
81 occurring in the tuberosphere was a trait associated with both the suppressive soil and cultivar.

82 CS-susceptible and resistant potato cultivars have not been compared yet in terms of their  
83 respective interactions with the soil microbial community, so that was the focus of the current  
84 work. We wanted to assess the relative importance of suppressive soil and resistant cultivar as  
85 ecological factors shaping bacterial community properties in CS disease suppression conditions,  
86 and identify the corresponding bacterial taxa. We used a field set-up that included a combination  
87 of both disease suppressive vs conducive soils, and resistant vs susceptible cultivars. Bacterial  
88 community structure in soil and potato tuberosphere was assessed by 16S rRNA taxonomic  
89 microarray and Illumina sequencing, and these results were compared to CS severity observed on  
90 tuber surface, quantity of thaxtomin biosynthetic genes *txtB*, quantities of total bacteria and  
91 actinobacteria and soil and periderm chemical characteristics.

92 Currently, next generation sequencing is the preferred approach to study bacterial  
93 communities. The method enables high throughput and financially-efficient description of  
94 bacterial taxa present in a sample. However, the method has its drawbacks. In particular, it is not  
95 highly quantitative so only a relative quantity of determined taxa can be assessed, and also it may  
96 be difficult to separate sequencing errors from real diversity (13). In comparison, taxonomic  
97 microarrays as a method for bacterial community assessments are more laborious (so are slower)  
98 and give results only for a selected group of taxa. However, these taxa can be purposefully  
99 selected and aimed at determining particular characteristics of bacterial community, and  
100 microarrays are semi quantitative (14), which makes microarrays a useful complement to

101 Illumina sequencing. In this work, we used a validated taxonomic microarray focusing on disease  
102 suppressive soils and bacterial taxa possessing plant growth-promoting and antagonistic traits in  
103 soil environments (15, 16), which was further extended with probes focusing on CS pathogens.  
104 The microarray approach was combined with amplicon Illumina sequencing to obtain deeper  
105 insight to relationships of bacterial communities in cultivar resistance and soil suppressiveness.

106

## 107 **RESULTS**

108 **Common scab severity and quantities of thaxtomin biosynthetic genes.** In conducive  
109 soil H, severity of CS (resulting from natural field infestation) was significantly higher in  
110 susceptible cultivar Agria than resistant cultivar Kariera (Fig. 1; ANOVA,  $p < 0.001$ ). In  
111 suppressive soil L, CS severity did not differ between the cultivars, and was as low as for the  
112 resistant cultivar in conducive soil. The number of *txtB* gene copies was similar in both soils  
113 (Supplementary Tables S2A and S4A), while in periderm it was significantly higher ( $p = 0.006$ ) in  
114 conducive than suppressive soil (Supplementary Tables S2B and S4B). The two cultivars grown  
115 in the same soil had comparable quantities of *txtB* gene copies in their periderm, yet, the number  
116 of *txtB* gene copies was significantly higher for susceptible cultivar Agria in conducive soil than  
117 in suppressive soil. In summary, CS control required resistant cultivar (independently of the soil)  
118 or suppressive soil (for susceptible cultivar).

119 **Chemical composition of tuberosphere soil and periderm.** In tuberosphere, contents of  
120 N, C, P, Ca, Fe and soil pH were significantly higher in conducive than suppressive soil  
121 (ANOVA; all  $p < 0.001$ ), while S content was significantly higher in suppressive soil (ANOVA;  
122  $p < 0.001$ ). Ca content was significantly higher in bulk soil than in tuberosphere of both soils  
123 (ANOVA;  $p < 0.001$ ; Supplementary Tables S3A and S4A). In periderm, N content was  
124 significantly higher in both cultivars from suppressive soil (ANOVA;  $p < 0.001$ ), Ca content was

125 significantly higher in susceptible cultivar Agria in both soils (ANOVA;  $p=0.011$ ), and Mg  
126 content was significantly higher in resistant cultivar Kariera in both soils (ANOVA;  $p<0.001$ ). Fe  
127 content was significantly higher in conducive soil in both cultivars (ANOVA;  $p=0.035$ ) and it  
128 was higher in the resistant cultivar in both soils (ANOVA;  $p=0.006$ ; Supplementary Tables S3B  
129 and S4B).

130 In summary, CS control was connected either with lower content of N, C, P, Ca, Fe and  
131 lower soil pH in tuberosphere in suppressive soil, or with higher content of Mg in periderm of the  
132 resistant cultivar. In addition, S content was significantly higher in tuberosphere for the  
133 combination of suppressive soil x resistant cultivar.

134 **Quantities of total bacteria and actinobacteria.** In tuberosphere, the quantities of  
135 bacteria (ANOVA;  $p<0.001$ ) and actinobacteria ( $p=0.006$ ) were higher in conducive than in  
136 suppressive soil. In suppressive soil the quantity of both bacteria ( $p=0.011$ ) and actinobacteria  
137 ( $p=0.019$ ) was significantly lower in plant tuberosphere compared to bulk soil (Supplementary  
138 Tables S2A and S4A). In periderm, the quantity of actinobacteria (ANOVA;  $p=0.021$ ) was  
139 significantly higher in conducive than in resistant cultivar Kariera suppressive soil in both  
140 cultivars and was also significantly higher in susceptible cultivar Agria than Kariera in conducive  
141 soil (Supplementary Tables S2B and S4B). In summary, quantities of total bacteria and  
142 actinobacteria depended on soil (suppressive vs conducive)  $\times$  cultivar (resistant vs susceptible)  $\times$   
143 compartment (periderm vs tuberosphere vs bulk soil) combination, with a trend for lower  
144 number(s) in suppressive soil and resistant cultivar.

145 **Bacterial community composition in bulk soil and tuberosphere by microarray**  
146 **analysis.** The 16S rRNA taxonomic microarray previously validated for bacterial community  
147 analysis of rhizosphere soil samples (15, 17) was expanded for coverage of the genus  
148 *Streptomyces*, including pathogen species *S. scabies* and relatives (Supplementary Table S1).

149 Non-metric multidimensional scaling (NMDS) plot of sample distances calculated from  
150 microarray data demonstrated that bacterial communities in conducive and suppressive soils were  
151 distinct, and in tuberosphere they were also influenced by cultivar (Fig. 2A). According to  
152 PERMANOVA, cultivar explained 42% variability and field site 13% variability. In particular,  
153 bacterial community in tuberosphere of the susceptible cultivar was separated from those of the  
154 resistant cultivar and bulk soil. Bacterial communities were significantly closer to each other  
155 within conducive or suppressive soil when compared to all samples (PERMANOVA;  $p=0.003$ )  
156 and samples of bacterial communities were significantly closer within each cultivar  
157 (PERMANOVA;  $p<0.001$ ) but not within each bulk soil. In tuberosphere, bacterial communities  
158 of resistant cultivar Kariera differed between the soils (PERMANOVA;  $p<0.001$ ), while bacterial  
159 communities of susceptible cultivar Agria did not differ significantly between the two soils but  
160 differed from those of resistant cultivar Kariera in each soil (PERMANOVA;  $p=0.029$ ).

161 In summary, our 16S rRNA probe set was expanded to target also the CS pathogens and  
162 other *Streptomyces* taxa. The resulting taxonomic microarray evidenced significant differences in  
163 bacterial community features when comparing suppressive vs conducive soil and resistant vs  
164 susceptible cultivar.

165 **Discriminant microarray probes according to soil and potato cultivar.** Microarray  
166 probes contributing to separation of suppressive from conducive soil were Brady4 (targeting the  
167 family *Bradyrhizobiaceae*), Pseu33 (*Pseudomonadaceae*), Aceto3A (*Acetobacteraceae*), and  
168 PalgiG3 (*Paenibacillaceae*), which were significantly higher in suppressive soil, as well as  
169 Janaga 2 and 3 (targeting the genus *Janthinobacterium*), which were significantly higher in  
170 conducive soil (Supplementary Table S5A). These differences seemed enhanced by tuberosphere  
171 of susceptible cultivar Agria, based on lower hybridization of probes targeting the genus  
172 *Streptomyces* or families *Rhizobiaceae* or *Bradyrhizobiaceae* but higher signals for probes aiming



173 at pathogenic *Streptomyces scabiei* group.

174 Probes contributing by their higher signal intensity to separation of resistant cultivar and  
175 bulk soil from the susceptible cultivar Agria were Rhizo157 and Rzbc1247 (both targeting the  
176 family *Rhizobiaceae*), Strepto1, 2, and 3 (targeting the genus *Streptomyces*) and Plancto4.mB  
177 (targeting the phylum *Planctomycetes*) (Supplementary Table S5B). Relatively small numbers of  
178 probes discriminated between the two soils when assessing bulk soil samples (only 2 probes),  
179 tuberospheres of the resistant cultivar Kariera (13 probes), and tuberospheres of the susceptible  
180 cultivar Agria (26 probes). Differences between samples from a same soil implicated somewhat  
181 comparable numbers of discriminating probes (Fig. 3A).

182 In summary, six probes targeting contrasted bacterial taxa discriminated between  
183 suppressive and conducive soils. Higher probe signals for CS pathogen were found with the  
184 susceptible cultivar.

185 **Bacterial community composition in bulk soil and tuberosphere by Illumina**  
186 **sequencing.** A total of 1,213,004 16S rRNA gene sequence reads were obtained, out of which  
187 944,597 (i.e. 78%) were mapped to 4001 OTUs. On a NMDS plot, bacterial communities of  
188 resistant cultivar Kariera, susceptible cultivar Agria and bulk soil were separated from one  
189 another within each field (Fig. 2B). When comparing both fields using significantly different  
190 OTUs (Metastats  $p < 0.05$ ), bacterial communities of bulk soils were separated, whereas they  
191 overlapped when comparisons were made for cultivar Kariera, or for cultivar Agria. The number  
192 of discriminating OTUs (Fig. 3B) was only 85 between both fields for resistant cultivar Kariera,  
193 382 between bulk soil and resistant cultivar Kariera in conducive soil, and 316 between bulk soil  
194 and susceptible cultivar Agria in suppressive soil, whereas the other pairwise differences between  
195 treatments implicated 954-1676 discriminating OTUs.

196 The relative proportion of bacterial phyla did not differ significantly between bulk soils,

197 except that *Actinobacteria* were higher and *Acidobacteria* lower in suppressive than in conducive  
198 soil (Supplementary Fig. S1A). Based on comparison with bulk soil, the tuberosphere  
199 communities implicated (i) an increase in relative proportion of *Chloroflexi* and decrease in that  
200 of *Verrucomicrobia*, *Gemmatimonadetes*, *Planctomycetes* and *Proteobacteria* in both cultivars  
201 (in the two fields; Supplementary Fig. S1A), (ii) an increase in relative proportion of  
202 *Bacteroidetes* (particularly the family *Sphingobacteraceae*) in resistant cultivar Kariera (in the  
203 two fields; Supplementary Fig. S1D), and (iii) an increase in relative proportion of *Firmicutes*  
204 (especially the family *Paenibacillaceae*) and *Actinobacteria* (especially the orders *Gaiellales*,  
205 *Micrococcales*, *Frankiales* and *Streptomycetales*) in susceptible cultivar Agria (in the two fields;  
206 Supplementary Fig. S1B,C). This increase in *Streptomycetales* was contributed by OTU 176, to  
207 which also the CS pathogen belongs. However, other members of this OTU contributed more  
208 significantly because this OTU was defined by centroid sequence, which was at 2.1-2.7%  
209 distance from the pathogen (Supplementary Table S6B).

210 Diversity of bacterial communities based on rarefaction curves showed that in both soils  
211 the lowest diversity was in tuberosphere of susceptible cultivar Agria. Above that, the curves  
212 were mixed for bulk soil and both cultivars in suppressive soil, while in conducive soil they were  
213 mixed only for bulk soil and tuberosphere of resistant cultivar Kariera. Therefore, the diversity in  
214 bulk soil was more heterogeneous in suppressive soil and differed more between cultivars in  
215 conducive soil (Supplementary Fig. S2).

216 In summary, Illumina sequencing of 16S rRNA genes evidenced differences between  
217 resistant and susceptible cultivars, the latter displaying lower bacterial diversity. Differences were  
218 also found and between suppressive and conducive soils, but mainly for bulk soil samples.

219 **Discriminant OTUs according to soil and potato cultivar.** When considering bulk as  
220 well as tuberosphere soil samples based on the discriminating OTUs (Metastats,  $p < 0.05$ ),

221 suppressive soil was enriched in *Plantomycetes* (OTUs 385, 2780) and *Bacteroidetes* (OTUs  
222 1402, 1154, 1408) and conducive soil in *Actinobacteria* (OTUs 355, 1230, 886) and *Chloroflexi*  
223 (OTU 1478). Different OTUs separating the two soils were found for *Proteobacteria* (with OTUs  
224 92, 253, 68, 592, 835 enriched in suppressive soil vs OTUs 369, 899, 2391, 1832, 2001 in  
225 conducive soil) and *Firmicutes* (OTU 3391 enriched in suppressive soil vs OTUs 2120, 2105,  
226 1772 in conducive soil) (Supplementary Table S6A).

227 The tuberosphere of Agria was enriched in taxa from orders *Frankiales* (*Frankiaceae*,  
228 *Acidothermaceae*, *Geodermatophilaceae*; OTUs 63, 20, 54, 117) and *Micrococcales*  
229 (*Intrasporangiaceae*; OTUs 13, 10) (Supplementary Table S6B, Supplementray Fig. S1B) and  
230 class *Gemmatimonadetes* (*Gemmatimonadaceae*; OTU 36), while tuberosphere of Kariera  
231 displayed significant enrichment in taxa from phylum *Acidobacteria* (OTUs 51, 275, 143, 138,  
232 76; Supplementary Table S6B, Supplementray Fig. S1A). Tuberosphere communities of both  
233 cultivars were also separated by different OTUs belonging to the same taxonomic groups. These  
234 discriminating taxa included (i) *Betaproteobacteria* i.e. *Burkholderiales* (OTU 38 in Agria vs  
235 OTU 199 in Kariera), (ii) *Alphaproteobacteria* i.e. *Sphingomonadales* (OTU 1 in Agria vs OTUs  
236 48, 696, 282 in Kariera), (iii) *Actinobacteria* i.e. *Propionibacteriales* (OTU 138 in Agria vs OTU  
237 6 in Kariera), *Gaiellales* (OTUs 21, 140, 41, 114, 104, 19, 8, 309, 213, 110, 23, 946 in Agria vs  
238 OTUs 16, 12, 30, 46, 107, 105, 24 in Kariera) and *Solirubrobacterales* (OTU 31 in Agria vs OTU  
239 69 in Kariera), and (iv) *Chloroflexi* (OTUs 18, 26, 77, 137 in Agria vs OTUs 4, 55, 164, 29, 123,  
240 284, 74 in Kariera) (Supplementary Table S6B).

241 In summary, suppressive soil was enriched in *Plantomycetes* and *Bacteroidetes* and  
242 conducive soil in *Actinobacteria* and *Chloroflexi*, and soils also differed in their *Proteobacteria*  
243 and *Firmicutes* profiles. Resistant and susceptible cultivars differed based on 1  
244 *Gemmatimonadetes*, 5 *Acidobacteria*, 6 *Proteobacteria*, 29 *Actinobacteria* and 11 *Chloroflexi*

245 discriminant OTUs.

246

## 247 **DISCUSSION**

248 Disease suppressiveness of Vyklantice soil L was shown in previous studies (9, 11) and  
249 since the soil has been regularly interrupted by cropping sequence over long time it can be  
250 considered naturally suppressive to the disease (2). In the current experiment, CS disease severity  
251 was assessed again in suppressive soil L and conducive soil H, under field conditions, but this  
252 time the significance of cultivar status was also investigated, by comparing two potato cultivars  
253 susceptible or resistant to CS. Results indicated that CS severity of the susceptible cultivar grown  
254 in the suppressive soil was as low as for (i) the resistant cultivar in the same soil, and (ii) the  
255 resistant cultivar in the conducive soil. These results showed the effect of soil suppressiveness  
256 and cultivar resistance on disease severity, and in particular the similar potential of both types of  
257 control mechanisms.

258 In contrast to our previous work, the current set-up enabled to compare soil  
259 suppressiveness and host resistance, and we further identified that soil suppressiveness was  
260 significantly related to (i) low quantities of bacteria and actinobacteria and (ii) low C, N contents  
261 and high S content in the tuberosphere, while cultivar resistance was related to high Mg content  
262 in the periderm. In spite of extensive literature on the positive effect of S on CS severity  
263 (reviewed in (18)) it does not seem that S was a key factor for CS control in our soils. A  
264 combination of both cultivar resistance and soil suppressiveness was related to (i) increased Fe  
265 content in both tuberosphere and periderm, and (ii) changes in pathogen populations, which is in  
266 agreement with our previous work (11), in which additions of available Fe to soil decreased CS  
267 severity.

268 Out of the parameters related to CS severity, the quantity of bacteria including

269 actinobacteria was previously linked with the amount of available carbon, which differed  
270 between conducive and suppressive soils (e.g. (19)). Specifically, the quantity and community  
271 structure of actinobacteria were connected to pathogen population and its interactions (11, 20).  
272 Further to that the quantity of pathogenic streptomycetes (based on numbers of *txtB* genes) did  
273 not change with soil suppressiveness or cultivar in tuberosphere and bulk soil, but in suppressive  
274 soil the number of pathogens decreased in potato periderm possibly due to both microbial  
275 interactions and soil chemical conditions depending on location (9, 21). In this study, however,  
276 the increased numbers of actinobacteria in periderm of susceptible cultivar did not correspond to  
277 pathogenic streptomycetes, so perhaps an antagonistic community of actinobacteria developed  
278 there as a response to pathogen infection, similarly as in Rosenzweig et al. (8) or Tomihama et al.  
279 (22).

280 The increase of magnesium in resistant cultivar may be explained by several aspects of  
281 CS disease and plant metabolism. Previously, we did not find any correlation between Mg  
282 periderm content and CS, probably because the field site effect was more important (12).  
283 However, the importance of site Mg concentration was correlated to CS and quantities of  
284 thaxtomine gene *txtA* in Lazarovits et al. (23), and similarly Lacey and Wilson (24) found that CS  
285 disease severity was related to contents in exchangeable Ca, Mg, and K cations. Generally, Mg  
286 has both indirect as well as direct effects on disease (25). Magnesium functions also as a P carrier  
287 in plants, and P periderm concentration was negatively correlated with CS in many studies (e.g.  
288 (12)). Also, root–microbial activities are key factors that determine plant-available Mg release  
289 from soils, and Mg was among nutrients affecting microbial community in potato rhizosphere  
290 (26). So, we concluded that Mg connection to resistant cultivar is a result of a combination of  
291 several factors, which specifically in our experiment resulted in diminishing of CS severity.  
292 Finally, higher Fe content in resistant cultivar than susceptible cultivar regardless of the nutrient

293 content in soil is probably connected to better acquisition of this element from soil, either by the  
294 resistant plant itself or through its selected bacterial community as pointed by Sarikhani et al.  
295 (11). This possibility was raised also by Inceoğlu et al. (27), where potato cultivars grown in two  
296 soils yielded different contents in C, S and P while selecting microbial communities with  
297 different functional capabilities

298 Bacterial community structure was identified as a major aspect of soil suppressiveness to  
299 CS (8). In our microarray study, *Pseudomonadaceae*, *Bradyrhizobiaceae*, *Acetobacteraceae* and  
300 *Paenibacillaceae* were associated with disease suppressiveness, and all four include plant-  
301 beneficial species and strains (3, 28). This was not expected, as the last three families were more  
302 prevalent in CS conducive than suppressive soil in Michigan (8). Our Illumina sequencing  
303 indicated that *Rhizobiales* and *Planctomycetales* were enriched in suppressive soil, as in Cha et  
304 al. (29), but *Actinobacteria*, *Chloroflexi*, *Bacillaceae*, and *Chitinophagaceae* that increased with  
305 CS suppressiveness induced by rice bran (22) were more prevalent in the conducive soil here.  
306 Therefore, different biocontrol consortia may be at work in different types of suppressive soils.  
307 Several phyla were more prevalent in the susceptible cultivar Agria, whereas others were more  
308 prevalent in the resistant cultivar Kariera, including *Nitrospirae* and *Acidobacteria* also enriched  
309 in suppressive soil studied by Cha et al. (29).

310 In this work, Illumina sequencing showed that major effects were due to resistant and  
311 susceptible cultivars and microarray analysis also evidenced the effect of suppressive versus  
312 conducive soils. The most relevant study to compare is that of Rosenzweig et al. (8) because they  
313 also studied CS suppressive soils using next generation sequencing, but they used a single,  
314 relatively CS resistant potato variety (Snowden), so they could not demonstrate the effect of  
315 cultivar in combination with soil suppressivity. In comparison, Weinert et al. (30) showed the  
316 effect of potato cultivar on rhizosphere bacteria selection, while Inceoğlu et al. (27) described

317 more profound influence of soil type over potato cultivar on bacterial rhizosphere communities  
318 but studied two soil types not disease suppressive and conducive soil. Therefore, our results  
319 brought new insight to bacterial community differences with respect to suppression of CS  
320 disease, possibly with a more general implication to other pathogen-plant systems.

321 Finally, the data obtained by Illumina sequencing and taxonomic microarrays are  
322 differently biased and to some extent showed different results. Microarray showed more  
323 differences between the two soils, while Illumina sequencing stressed differences between  
324 cultivars. In particular, microarray demonstrated increase of *Streptomyces* (*Actinobacteria*),  
325 *Bradyrhizobium*, *Burkholderia* (*Proteobacteria*) or *Nitrospira* (*Nitrospirae*) in suppressive soil,  
326 while increase of *Acidibacteria*, *Pseudomonas*, *Agrobacterium* and *Janithobacterium*  
327 (*Proteobacteria*) in conducive soil. *Streptomyces* and *Rhizobiaceae* were associated with resistant  
328 cultivar Kariera, while *Burkholderia* and *Stingomonas* (*Proteobacteria*) were associated with  
329 susceptible cultivar Agria. Illumina sequencing discriminated the two soils similarly to  
330 microarray by increase of *Bradyrhizobiaceae* and other *Proteobacteria*, but also *Bacteroidetes*  
331 and *Firmicutes* in suppressive soil, while different families of *Proteobacteria*, *Actinobacteria* and  
332 *Firmicutes* increased in conducive soil. For resistant cultivar Kariera, *Chloroflexi*, *Gaiellales*  
333 (*Actinobacteria*) were found enriched, while in susceptible cultivar Agria, similarly to microarray  
334 results *Burkholderia* and *Sphinomonas* (*Proteobacteria*) and *Actinobacteria* were enriched. We  
335 explain the differences by specific characteristics of the two methodological approaches (14–16,  
336 31, 32).

337 In conclusion, we demonstrated the cultivar-specific community selection with respect to  
338 their susceptibility or resistance to CS and above that we included comparison of this trait in  
339 suppressive and conducive soils. We showed that CS can be controlled either with resistant  
340 cultivar or with suppressive soil, with no additive effect between them. Out of the two factors,



341 potato cultivar had a higher effect on tuberosphere bacterial community composition than soil in  
342 our experiment. Results highlighted the usefulness of both cultivar resistance and soil  
343 suppressiveness traits in understanding and managing disease control of crops.

344

## 345 MATERIALS AND METHODS

346 **Sites.** Vyklantice is a site where fields suppressive (L for low disease severity), and  
347 conducive (H for high disease severity) to potato CS occur at about 100 m distance. The two  
348 fields differ in common scab severity by observations over 30 years, while their geological  
349 context, soil type, climate and management are similar. The fields were regularly planted under a  
350 four-year crop rotation system including rapeseed, clover, potatoes, and grains (wheat or oats) in  
351 the past two decades (9).

352 **Field experiment.** Potatoes were planted in the beginning of May and samples of bulk  
353 soil, tuberosphere soil and potatoes were collected after 80 days. One susceptible cultivar (Agria)  
354 and another resistant (Kariera) to CS were used. Potatoes were all certified seed tubers (common  
355 scab below 5% of surface). Four plots of each cultivar were planted at each field and the plots  
356 were arranged in a Latin square design. Each plot was planted with 3 rows of 12 potato plants (36  
357 plants) separated by 50 cm of bare soil. Fields were fertilized with 100 kg N/ha (ammonium  
358 sulphate, 21% N), 35 kg P/ha (monocalcium phosphate, 35% P<sub>2</sub>O<sub>5</sub>), and 60 kg K/ha (potassium  
359 salt, 50% K<sub>2</sub>O). Potatoes were treated with pesticides, once with Nurelle D (EC) (chlorpyrifos,  
360 cypermethrin) at 0.6 l/ha to prevent Colorado potato beetle (*Leptinotarsa decemlineata*), and  
361 twice with Acrobat MZ (dimethomorph, mancozeb) at 2 kg/ha and Ridomil Gold MZ Pepite  
362 (mancozeb, metalaxyl-M) at 2.5 kg/ha against the potato blight. Fungicides were not used.

363 **Sampling.** One potato plant growing in the center of each plot was sampled. Potatoes  
364 from this plant were collected and washed in distilled water. All potatoes were carefully peeled



365 using a sterile potato peeler (taking approximately 1 mm thick periderm samples), peels were  
366 homogenized and mixed, and subsamples (1 subsample per plant) were taken for further analyses  
367 ('periderm' samples). Tuberosphere soil samples were collected no further than 3 mm from a  
368 potato tuber (for details see (9)). Bulk soil was collected at a distance of approximately 30 cm  
369 from the closest plant within each plot using a small sterile spade (1 sample per plot). Common  
370 scab severity was evaluated on 20 potato tubers per plot using a 9-degree scale (33). Potatoes  
371 used for evaluation were those of the collected plant and several more plants from each plot to  
372 achieve at least 20 measurements per plot.

373 **Soil and potato periderm analyses.** To determine total soil C, N, and S contents, 2-g  
374 samples of homogenized soil from both bulk soil and tuberosphere were dried, milled, and  
375 analyzed using Vario MAX CNS analyzer (Elementar Analysensysteme, Hanau, Germany). To  
376 determine all other elements, soil subsamples were leached with boiling nitro-hydrochloric acid  
377 (aqua regia) and assessed by optical emission spectroscopy with inductively coupled plasma  
378 (ICP-OES) by Aquatest Inc. (Prague, Czech Republic). Analyses of potato periderm were  
379 performed by service laboratory of the Institute of Botany (Trebou, Czech Republic). For total  
380 nitrogen analysis, 1-3 mg dried periderm was mineralized by modified Kjeldahl method in H<sub>2</sub>SO<sub>4</sub>  
381 with catalyzer at 360°C. For total phosphorus, 20 mg of dried periderm was sequentially  
382 decomposed by HNO<sub>3</sub> and HClO<sub>4</sub>. In mineralized samples, both N and P were determined by  
383 flow injection analysis with spectrophotometric detection using FIA Lachat QC 8500 analyzer  
384 (Lachat Instruments, Hach Company, Loveland, CO). Cation contents in periderm were  
385 determined by atomic absorption spectrometry using AAS spectrometer ContrAA 700 (Analytik  
386 Jena, Jena, Germany) after mineralization with nitro-hydrochloric acid.

387 **Soil DNA extraction.** Soil samples from tuberosphere and bulk soil were homogenized  
388 and subsamples of 0.5 g were used for DNA extraction by method SK described by Sagova-

389 Mareckova et al. (34). Briefly, the method is based on bead-beating and phenol/chloroform  
390 extraction followed by purification with CaCl<sub>2</sub> and GeneClean Turbo kit (MP Biomedicals, Santa  
391 Ana, CA). For DNA extraction from potato periderm, 3 g of periderm samples were fine cut in  
392 sterile Petri dish, homogenized, and a 0.3 g subsample was processed in the same way as soil  
393 samples to obtain total periderm DNA.

394 **Real-time PCR (qPCR).** Quantifications were performed with primers eub338f (5'-  
395 ACTCCTACGGGAGGCAGCAG-3') (35) and eub518r (5'-ATTACCGCGGCTGCTGG-3') (36)  
396 amplifying a 197 bp fragment of the 16S rRNA gene from bacteria, act235f (5'-  
397 CGCGGCCTATCAGCTTGTTG-3') (37) and eub518r yielding a 280 bp product for  
398 *Actinobacteria*, and StrepF (5'-GCAGGACGCTCACCAGGTAGT-3') and StrepR (5'-  
399 ACTTCGACACCGTTGTCCTCAA-3') yielding a 72 bp amplicon of the thaxtomin biosynthetic  
400 gene *txtB* (38), respectively. The analyses were done on a StepOne Plus Real-Time PCR System  
401 (Applied Biosystems, Foster City, CA) using 96-well plates with GoTaq qPCR Master Mix  
402 (Promega) containing SYBR Green as a double-stranded DNA binding dye. The reaction mixture  
403 contained in a total volume of 15 µl: 1× GoTaq qPCR Master Mix, 0.2 µM primers, and 0.2-2 ng  
404 diluted DNA sample. For all of the mentioned targets the PCR cycling protocol consisted of  
405 initial denaturation at 95°C for 10 min, followed by 45 cycles of 95°C for 15 s, 60°C for 30 s and  
406 72°C for 30 s. Melting curves were recorded to ensure qPCR specificity. Baseline and threshold  
407 calculations were performed with the StepOne v. 2.2.2 software. The inhibition was tested by  
408 serial DNA dilution from each site, and the dilutions without inhibition of qPCR reactions were  
409 used for quantification. All qPCR measurements were done in duplicate. Standards for qPCR  
410 were prepared by cloning fragments of target genes from *Streptomyces europaeiscabiei* DSM  
411 41802 in pGEM-T Easy vector system (Promega). After PCR verification and isolation of cloned  
412 constructs by Pure Yield Plasmid Miniprep System (Promega), a linear standard was prepared by

413 cleaving with SalI enzyme (New England Biolabs, UK) in a 200  $\mu$ l reaction mixture containing  
414 1 $\times$  reaction buffer, 2  $\mu$ g circular plasmid, and 20 U restriction endonuclease for 2 h in 37°C. The  
415 linearized plasmid DNA was purified by phenol-chloroform extraction. Aliquots of linearized  
416 and purified standard diluted to 20 ng / $\mu$ l were stored in -70°C. Results were expressed per g dry  
417 soil. All results (including for *txtB*) were above detection limit.

418 **16S rRNA gene-based taxonomic microarray.** A taxonomic microarray based on DNA  
419 probes targeting 16S rRNA genes representing 19 bacterial phyla at different taxonomic levels  
420 (15) was used to assess soil samples from potato fields. This microarray was validated previously  
421 (15, 17). Twelve probes targeting the genus *Streptomyces*, as well as *S. scabies* and relatives  
422 (Supplementary Table S1) were added to the previous probe set (1033 probes) in this study. The  
423 probe KO 08 (39) for genus *Streptomyces* was obtained via the *probeBase* server (40)  
424 (<http://probebase.csb.univie.ac.at>). The other 11 probes (20-mers) were designed in this study  
425 using ARB software (41) (<http://www.arb-home.de>) and the parameters of the Probe Design  
426 function chosen by Sanguin et al. (31, 42). Probe specificity was tested with the Probe Match  
427 function in ARB against the reference Silva-104 and with the TestProbe online tool against Silva  
428 126 database (43) (<http://www.arb-silva.de>), at the weighted mismatch value of 1.5 (15).  
429 Hybridization properties of probes (e.g. melting temperature, potential formation of secondary  
430 structures and 3'dimers) were further tested *in silico*, according to Sanguin et al. (31, 42).

431 Universal bacterial primers T7-pA (forward; TAATACGACTCACTATAG-  
432 AGAGTTTGATCCTGGCTCAG) and pH (reverse; AAGGAGGTGATCCAGCCGCA) were  
433 used to amplify 16S rRNA genes from total DNA extracts (44). Primer T7-pA includes at the 5'  
434 end the sequence of T7 promoter, which enabled T7 RNA polymerase-mediated *in vitro*  
435 transcription using purified PCR products as templates. PCR reactions were carried out using Taq  
436 Expand High Fidelity (Roche Applied Science, Meylan, France) and cycling conditions described

437 in Kyselková et al. (15). Purified PCR products (50 ng/μl) were fluorescently labelled (Cy3) by  
438 *in vitro* transcription, according to Stralis-Pavese et al. (45). Purified RNA was fragmented by  
439 incubation with ZnSO<sub>4</sub>, as described (45), and 400 ng subjected to hybridization on the  
440 microarray. Each probe was present in four copies per slide, and two slides were hybridized per  
441 sample.

442 Hybridization was carried out according to Sanguin et al. (31). Slides were scanned at 532  
443 nm, images were analyzed with GenePix Pro 7 (Molecular Devices, Sunnyvale, CA), and spot  
444 quality was checked visually, as described previously (31). Data filtration was conducted using R  
445 3.3.0 (46) (<http://www.r-project.org>). Hybridization of a given spot was considered positive when  
446 80% of the spot pixels had intensity higher than the median local background pixel intensity plus  
447 twice the standard deviation of the local background. Intensity signals (median of signal minus  
448 background) were replaced by their square root value and intensity of each spot was then  
449 expressed as a fraction of the total intensity signal of the basic pattern it belongs to (42). Finally,  
450 a given feature probe was considered as truly hybridized when (i) hybridization signals were  
451 superior to the mean signal of the negative controls and (ii) at least 3 of 4 replicate spots  
452 displayed positive hybridization (15).

453 **Illumina MiSeq sequencing and analysis.** From the DNA samples, a fragment of the  
454 bacterial 16S rRNA gene including the variable region V4 was amplified by PCR using universal  
455 primers with overhang adapters CS1-515F (5'-  
456 AACTGACGACATGGTTCTACAGTGCCAGCMGCCGCGGTAA-3') and CS2-806R 5'-  
457 TACGGTAGCAGAGACTTGGTCTGGACTACHVGGGTWTCTAAT-3') (47). Construction of  
458 amplicon libraries and sequencing using MiSeq sequencer (Illumina, San Diego, CA) were done  
459 at the DNA Services Facility, Research Resources Center, University of Illinois (Chicago, MI).  
460 Resulting paired sequence reads were merged, filtered, aligned using reference alignment from

461 the Silva database (43), and chimera checked using integrated Vsearch tool (48) according to the  
462 MiSeq standard operation procedure (Miseq SOP, February 2018) (49) in Mothur v. 1.39.5  
463 software (50). A taxonomical assignment of sequence libraries was performed in Mothur using  
464 the Silva Small Subunit rRNA Database, release 128 (51) adapted for use in Mothur  
465 ([https://mothur.org/w/images/b/b4/Silva.nr\\_v128.tgz](https://mothur.org/w/images/b/b4/Silva.nr_v128.tgz)) as the reference database. Sequences of  
466 plastids, mitochondria, and those not classified in the domain Bacteria were discarded. The  
467 sequence library was clustered into OTUs using the Uparse pipeline in Usearch v10.0.240  
468 software (13), and the OTU table was further processed using tools implemented in the Mothur  
469 software. Distance matrices describing the differences in community composition between  
470 individual samples were calculated using the Yue-Clayton theta calculator (52). Analysis of  
471 molecular variance (AMOVA) (53) was based on a matrix of Yue-Clayton theta distances.  
472 Metastats analysis (54) was used to detect differentially represented OTUs.

473 **Statistical analyses.** Analysis of variance (ANOVA) and Fisher LSD tests were used to  
474 test differences between soils and cultivars for soil chemical parameters and copy numbers of  
475 bacterial and actinobacterial 16S rRNA genes, and *txtB* genes in soil and periderm samples.  
476 Permutational multivariate analysis of variance (PERMANOVA) was used to compare distance  
477 matrices between microarray samples (55). AMOVA was used to test differences between  
478 distance matrices (Yue-Clayton Theta) between Illumina samples. The distance matrices were  
479 plotted by Sammon's Multidimensional Scaling (56).

480 **Accession number.** MiSeq 16S rRNA gene amplicon sequences have been deposited in  
481 the NCBI Sequence Read Archive ([www.ncbi.nlm.nih.gov/sra](http://www.ncbi.nlm.nih.gov/sra)) as BioProject PRJNA474544.

482

## 483 **ACKNOWLEDGEMENTS**

484 This work was supported by the Ministry of Agriculture of the Czech Republic, grants

485 QK1810370 and RO0417. We would like to thank Stefan Green and the DNA Service Facility of  
486 the UIC for MiSeq sequencing.

487

## 488 **References**

- 489 1. Baker K, Cook RJ. 1974. Biological control of plant pathogens. Biological control of plant  
490 pathogens. W.H. Freeman and Co., San Francisco.
- 491 2. Janvier C, Villeneuve F, Alabouvette C, Edel-Hermann V, Mateille T, Steinberg C. 2007.  
492 Soil health through soil disease suppression: Which strategy from descriptors to  
493 indicators? *Soil Biol Biochem* 39:1–23.
- 494 3. Kyselková M, Moëgne-Loccozy Y. 2012. Pseudomonas and other Microbes in Disease-  
495 Suppressive Soils, p. 93–140. *In* Lichtfouse E (ed.), *Organic Fertilisation, Soil Quality and*  
496 *Human Health, Sustainable Agriculture Reviews 9*. Springer Science+Business Media  
497 B.V., Dordrecht.
- 498 4. Kinkel LL, Bakker MG, Schlatter DC. 2011. A Coevolutionary Framework for Managing  
499 Disease-Suppressive Soils. *Annu Rev Phytopathol* 49:47–67.
- 500 5. Larkin RP. 2008. Relative effects of biological amendments and crop rotations on soil  
501 microbial communities and soilborne diseases of potato. *Soil Biol Biochem* 40:1341–1351.
- 502 6. Meng Q, Yin J, Rosenzweig N, Douches D, Hao JJ. 2012. Culture-Based Assessment of  
503 Microbial Communities in Soil Suppressive to Potato Common Scab. *Plant Dis* 96:712–  
504 717.
- 505 7. Lorang JM, Liu D, Anderson NA, Schottel JL. 1995. Identification of potato scab inducing  
506 and suppressive species of *Streptomyces*. *Phytopathology* 85:261–268.
- 507 8. Rosenzweig N, Tiedje JM, Quensen JF, Meng Q, Hao JJ. 2012. Microbial Communities  
508 Associated with Potato Common Scab-Suppressive Soil Determined by Pyrosequencing

- 509 Analyses. *Plant Dis* 96:718–725.
- 510 9. Sagova-Mareckova M, Daniel O, Omelka M, Kristufek V, Divis J, Kopecky J. 2015.  
511 Determination of factors associated with natural soil suppressivity to potato common scab.  
512 *PLoS One* 10:1–13.
- 513 10. Sagova-Mareckova M, Omelka M, Kopecky J. 2017. Sequential analysis of soil factors  
514 related to common scab of potatoes. *FEMS Microbiol Ecol* 93:fiw201.
- 515 11. Sarikhani E, Sagova-Mareckova M, Omelka M, Kopecky J. 2017. The effect of peat and  
516 iron supplements on the severity of potato common scab and bacterial community in  
517 tuberosphere soil. *FEMS Microbiol Ecol* 93:fiw206.
- 518 12. Křišťufek V, Diviš J, Omelka M, Kopecký J, Ságová-Marečková M. 2015. Site, year and  
519 cultivar effects on relationships between periderm nutrient contents and common scab  
520 severity. *Am J Potato Res* 92:473–482.
- 521 13. Edgar RC. 2013. UPARSE: Highly accurate OTU sequences from microbial amplicon  
522 reads. *Nat Methods* 10:996–998.
- 523 14. Paliy O, Agans R. 2012. Application of phylogenetic microarrays to interrogation of  
524 human microbiota. *FEMS Microbiol Ecol* 79:2–11.
- 525 15. Kyselková M, Kopecký J, Frapolli M, Défago G, Ságová-Marecková M, Grundmann GL,  
526 Moëgne-Loccoz Y. 2009. Comparison of rhizobacterial community composition in soil  
527 suppressive or conducive to tobacco black root rot disease. *ISME J* 3:1127–38.
- 528 16. Kyselková M, Almario J, Kopecký J, Ságová-Marečková M, Haurat J, Muller D,  
529 Grundmann GL, Moëgne-Loccoz Y. 2014. Evaluation of rhizobacterial indicators of  
530 tobacco black root rot suppressiveness in farmers' fields. *Environ Microbiol Rep* 6:346–  
531 53.
- 532 17. Bouffaud M-L, Kyselková M, Gouesnard B, Grundmann G, Muller D, Moëgne-Loccoz Y.

- 533 2012. Is diversification history of maize influencing selection of soil bacteria by roots?  
534 *Mol Ecol* 21:195–206.
- 535 18. Dees MW, Wanner LA. 2012. In Search of Better Management of Potato Common Scab.  
536 *Potato Res* 55:249–268.
- 537 19. McDaniel MD, Tiemann LK, Grandy AS. 2014. Does agricultural crop diversity enhance  
538 soil microbial biomass and organic matter dynamics? A meta-analysis. *Ecol Appl* 24:560–  
539 570.
- 540 20. Schottel JL, Shimizu K, Kinkel LL. 2001. Relationships of in vitro pathogen inhibition and  
541 soil colonization to potato scab biocontrol by antagonistic *Streptomyces* spp. *Biol Control*  
542 20:102–112.
- 543 21. Kobayashi A, Kobayashi YO, Someya N, Ikeda S. 2015. Community Analysis of Root-  
544 and Tuber-Associated Bacteria in Field-Grown Potato Plants Harboring Different  
545 Resistance Levels against Common Scab. *Microbes Environ* 30:301–309.
- 546 22. Tomihama T, Nishi Y, Mori K, Shirao T, Iida T, Uzuhashi S, Ohkuma M, Ikeda S. 2016.  
547 Rice Bran Amendment Suppresses Potato Common Scab by Increasing Antagonistic  
548 Bacterial Community Levels in the Rhizosphere. *Phytopathology* 106:719–728.
- 549 23. Lazarovits G, Hill J, Patterson G, Conn KL, Crump NS. 2007. Edaphic Soil Levels of  
550 Mineral Nutrients, pH, Organic Matter, and Cationic Exchange Capacity in the  
551 Geocaulosphere Associated with Potato Common Scab. *Phytopathology* 97:1071–1082.
- 552 24. Lacey MJ, Wilson CR. 2001. Relationship of common scab incidence of potatoes grown in  
553 Tasmanian ferrosol soils with pH, exchangeable cations and other chemical properties of  
554 those soils. *J Phytopathol* 149:679–683.
- 555 25. Huber DM, Jones JB. 2013. The role of magnesium in plant disease. *Plant Soil* 368:73–85.
- 556 26. Barnett BA, Holm DG, Koym JW, Wilson RG, Manter DK. 2015. Site and Clone Effects



- 557 on the Potato Root-Associated Core Microbiome and its Relationship to Tuber Yield and  
558 Nutrients. *Am J Potato Res* 92:1–9.
- 559 27. Inceoğlu Ö, Salles JF, van Elsas JD. 2012. Soil and Cultivar Type Shape the Bacterial  
560 Community in the Potato Rhizosphere. *Microb Ecol* 63:460–470.
- 561 28. Brader G, Compant S, Mitter B, Trognitz F, Sessitsch A. 2014. Metabolic potential of  
562 endophytic bacteria. *Curr Opin Biotechnol* 27:30–7.
- 563 29. Cha JY, Han S, Hong HJ, Cho H, Kim D, Kwon Y, Kwon SK, Crusemann M, Bok Lee Y,  
564 Kim JF, Giaever G, Nislow C, Moore BS, Thomashow LS, Weller DM, Kwak YS. 2016.  
565 Microbial and biochemical basis of a *Fusarium* wilt-suppressive soil. *ISME J* 10:119–129.
- 566 30. Weinert N, Meincke R, Gottwald C, Heuer H, Schloter M, Berg G, Smalla K. 2010.  
567 Bacterial diversity on the surface of potato tubers in soil and the influence of the plant  
568 genotype. *FEMS Microbiol Ecol* 74:114–123.
- 569 31. Sanguin H, Remenant B, Dechesne A, Thioulouse J, Vogel TM, Nesme X, Moënne-  
570 Loccoz Y, Grundmann GL. 2006. Potential of a 16S rRNA-based taxonomic microarray  
571 for analyzing the rhizosphere effects of maize on *Agrobacterium* spp. and bacterial  
572 communities. *Appl Environ Microbiol* 72:4302–12.
- 573 32. Donn S, Almario J, Muller D, Moënne-Loccoz Y, Gupta VVSR, Kirkegaard JA,  
574 Richardson AE. 2014. Rhizosphere microbial communities associated with *Rhizoctonia*  
575 damage at the field and disease patch scale. *Appl Soil Ecol* 78:37–47.
- 576 33. Wenzl H, Demel J. 1967. Bildskalen für die Beurteilung von Kartoffelschorf und  
577 *Rhizoctonia*-Pocken. *Der Pflanzenarzt* 20:77–78.
- 578 34. Sagova-Mareckova M, Cermak L, Novotna J, Plhackova K, Forstova J, Kopecky J. 2008.  
579 Innovative methods for soil DNA purification tested in soils with widely differing  
580 characteristics. *Appl Environ Microbiol* 74:2902–2907.

- 581 35. Lane DJ. 1991. 16S/23S rRNA Sequencing. *Nucleic acid Tech Bact Syst* 115–175.
- 582 36. Muyzer G, De Waal EC, Uitterlinden AG. 1993. Profiling of complex microbial  
583 populations by denaturing gradient gel electrophoresis analysis of polymerase chain  
584 reaction-amplified genes coding for 16S rRNA. *Appl Environ Microbiol* 59:695–700.
- 585 37. Stach JEM, Maldonado LA, Ward AC, Goodfellow M, Bull AT. 2003. New primers for  
586 the class Actinobacteria: Application to marine and terrestrial environments. *Environ*  
587 *Microbiol* 5:828–841.
- 588 38. Qu X, Wanner LA, Christ BJ. 2008. Using the TxtAB operon to quantify pathogenic  
589 *Streptomyces* in potato tubers and soil. *Phytopathology* 98:405–12.
- 590 39. Franke-Whittle IH, Klammer SH, Insam H. 2005. Design and application of an  
591 oligonucleotide microarray for the investigation of compost microbial communities. *J*  
592 *Microbiol Methods* 62:37–56.
- 593 40. Greuter D, Loy A, Horn M, Rattei T. 2016. probeBase--an online resource for rRNA-  
594 targeted oligonucleotide probes and primers: new features 2016. *Nucleic Acids Res*  
595 44:D586-9.
- 596 41. Ludwig W, Strunk O, Westram R, Richter L, Meier H, Yadhukumar, Buchner A, Lai T,  
597 Steppi S, Jobb G, Förster W, Brettske I, Gerber S, Ginhart AW, Gross O, Grumann S,  
598 Hermann S, Jost R, König A, Liss T, Lüssmann R, May M, Nonhoff B, Reichel B,  
599 Strehlow R, Stamatakis A, Stuckmann N, Vilbig A, Lenke M, Ludwig T, Bode A,  
600 Schleifer K-H. 2004. ARB: a software environment for sequence data. *Nucleic Acids Res*  
601 32:1363–71.
- 602 42. Sanguin H, Herrera A, Oger-Desfeux C, Dechesne A, Simonet P, Navarro E, Vogel TM,  
603 Moënne-Loccoz Y, Nesme X, Grundmann GL. 2006. Development and validation of a  
604 prototype 16S rRNA-based taxonomic microarray for Alphaproteobacteria. *Environ*

- 605 Microbiol 8:289–307.
- 606 43. Quast C, Pruesse E, Yilmaz P, Gerken J, Schweer T, Yarza P, Peplies J, Glöckner FO.  
607 2013. The SILVA ribosomal RNA gene database project: improved data processing and  
608 web-based tools. *Nucleic Acids Res* 41:D590-6.
- 609 44. Bruce KD, Hiorns WD, Hobman JL, Osborn AM, Strike P, Ritchie DA. 1992.  
610 Amplification of DNA from native populations of soil bacteria by using the polymerase  
611 chain reaction. *Appl Environ Microbiol* 58:3413–6.
- 612 45. Stralis-Pavese N, Sessitsch A, Weilharter A, Reichenauer T, Riesing J, Csontos J, Murrell  
613 JC, Bodrossy L. 2004. Optimization of diagnostic microarray for application in analysing  
614 landfill methanotroph communities under different plant covers. *Environ Microbiol* 6:347–  
615 63.
- 616 46. R Core Team. 2017. R: A language and environment for statistical computing. R Found  
617 Stat Comput Vienna, Austria.
- 618 47. Caporaso JG, Lauber CL, Walters WA, Berg-Lyons D, Lozupone CA, Turnbaugh PJ,  
619 Fierer N, Knight R. 2011. Global patterns of 16S rRNA diversity at a depth of millions of  
620 sequences per sample. *Proc Natl Acad Sci* 108:4516–4522.
- 621 48. Rognes T, Flouri T, Nichols B, Quince C, Mahé F. 2016. VSEARCH: a versatile open  
622 source tool for metagenomics. *PeerJ* 4:e2584.
- 623 49. Kozich JJ, Westcott SL, Baxter NT, Highlander SK, Schloss PD. 2013. Development of a  
624 dual-index sequencing strategy and curation pipeline for analyzing amplicon sequence data  
625 on the miseq illumina sequencing platform. *Appl Environ Microbiol* 79:5112–5120.
- 626 50. Schloss PD, Westcott SL, Ryabin T, Hall JR, Hartmann M, Hollister EB, Lesniewski RA,  
627 Oakley BB, Parks DH, Robinson CJ, Sahl JW, Stres B, Thallinger GG, Van Horn DJ,  
628 Weber CF. 2009. Introducing mothur: Open-source, platform-independent, community-

- 629 supported software for describing and comparing microbial communities. *Appl Environ*  
630 *Microbiol* 75:7537–7541.
- 631 51. Yilmaz P, Parfrey LW, Yarza P, Gerken J, Pruesse E, Quast C, Schweer T, Peplies J,  
632 Ludwig W, Glöckner FO. 2014. The SILVA and “All-species Living Tree Project (LTP)”  
633 taxonomic frameworks. *Nucleic Acids Res* 42:D643–D648.
- 634 52. Yue JC, Clayton MK. 2005. A similarity measure based on species proportions. *Commun*  
635 *Stat - Theory Methods* 34:2123–2131.
- 636 53. Martin AP. 2002. Phylogenetic approaches for describing and comparing the diversity of  
637 microbial communities. *Appl Environ Microbiol* 68:3673–82.
- 638 54. White JR, Nagarajan N, Pop M. 2009. Statistical methods for detecting differentially  
639 abundant features in clinical metagenomic samples. *PLoS Comput Biol* 5:e1000352.
- 640 55. McArdle BH, Anderson MJ. 2001. Fitting multivariate models to community data: A  
641 comment on distance-based redundancy analysis. *Ecology* 82:290–297.
- 642 56. Venerables WN, Ripley BD. 2002. *Modern applied statistics with S*. Springer, New York.

643 **Figures**

644

645 **FIG 1** Severity of common scab of susceptible cultivar Agria and resistant cultivar Kariera in  
646 suppressive and conducive soils (means  $\pm$  standard deviations, n = 4). Statistical significance  
647 between treatments (ANOVA) are shown with letters a and b.

648

649 **FIG 2** Bacterial communities in tuberosphere of CS-susceptible cultivar Agria (circles) and CS-  
650 resistant cultivar Kariera (squares), and in bulk soil (pentagons) assayed by 16S rRNA taxonomic  
651 microarray (A) and 16S rRNA gene Illumina amplicon sequencing (B) in CS-suppressive (open  
652 symbols) and CS-conductive soils (grey symbols). Non-metric multidimensional scaling of  
653 distance matrices was based on Yue-Clayton theta calculator.

654

655 **FIG 3** Differences between bacterial communities in tuberosphere of CS-susceptible cultivar  
656 Agria (circles) and CS-resistant cultivar Kariera (squares), and in bulk soil (pentagons) assayed  
657 by 16S rRNA taxonomic microarray (A) and 16S rRNA gene Illumina amplicon sequencing (B)  
658 in CS-suppressive (L, open symbols) and CS-conductive (H, grey symbols) soils. Numbers  
659 indicate the numbers of probes (A) and OTUs (B) significantly contributing to the difference  
660 between samples in pairwise comparisons (Metastats,  $p < 0.05$ ).

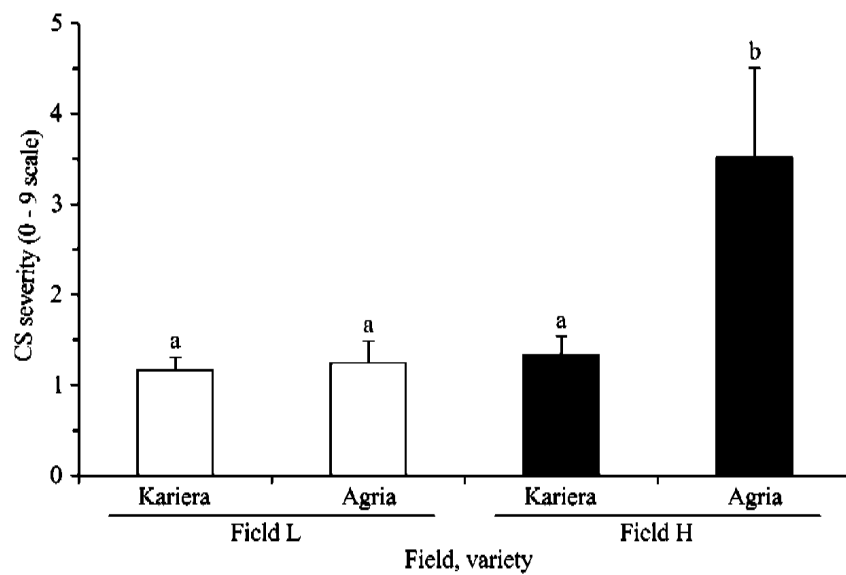

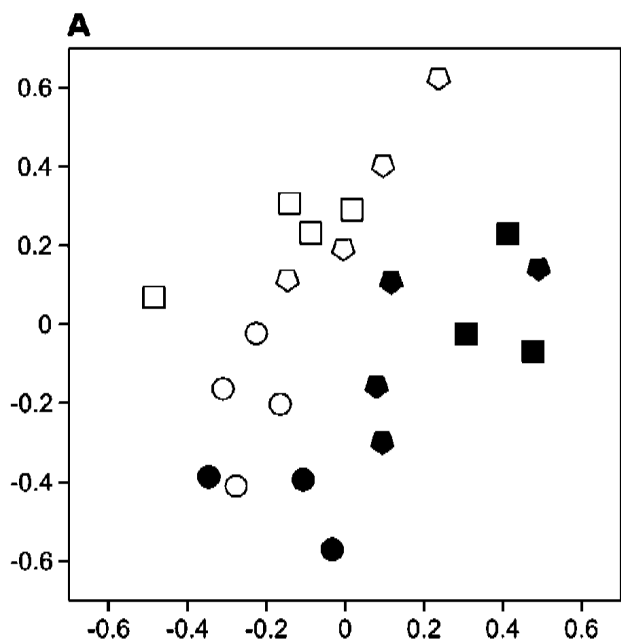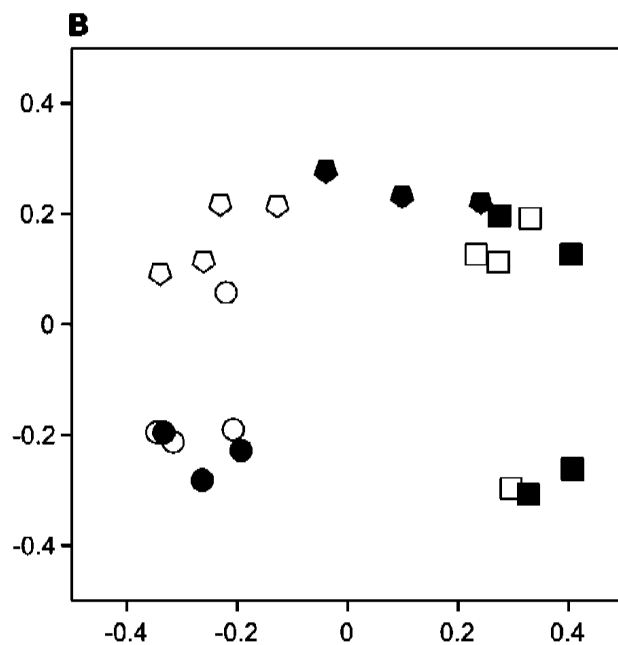

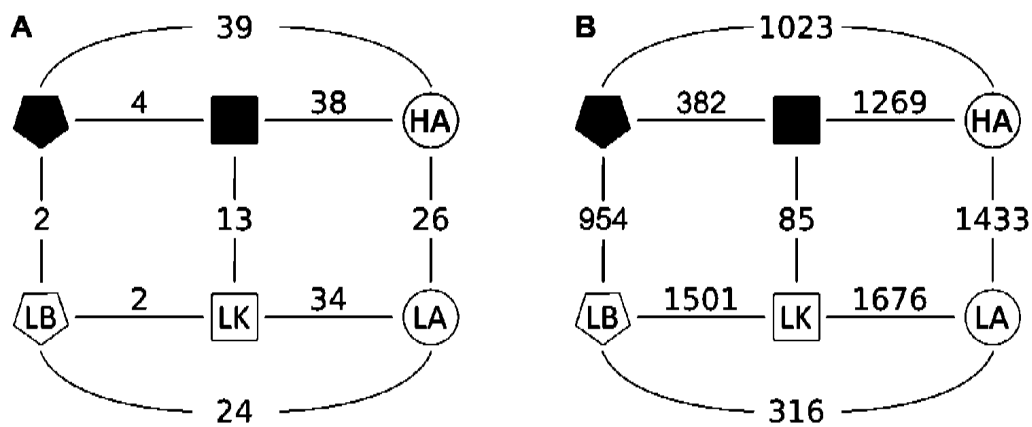

Source: https://www.biorxiv.org/content/10.1101/340257.full.pdf
